# Supplementary material
Source: bioRxiv or medRxiv preprint supplement (http://medrxiv.org/highwire/filestream/72088/field_highwire_adjunct_files/0/2020.02.11.20022129-1.pdf)
Supplement: Supplementary file [file 2020.02.11.20022129-1.pdf]

# Data extraction form

Reviewer

|    |    |
|----|----|
| DC | SA |
|----|----|

Title of study

|  |
|--|
|  |
|--|

First author

|  |
|--|
|  |
|--|

Year published

|  |
|--|
|  |
|--|

## Exclusion checkpoint

Needs YES to all

|                          |                                |                                         |
|--------------------------|--------------------------------|-----------------------------------------|
| 2 scans before and after | Smoking cessation during study | COPD patients included in this analysis |
|--------------------------|--------------------------------|-----------------------------------------|

If NO answered to any of the above, exclude from extraction and review.

## Participants

At baseline:

### ***COPD definition***

|             |      |     |        |
|-------------|------|-----|--------|
| Not defined | GOLD | LLN | Other: |
|-------------|------|-----|--------|

### ***Smoking cessation definition***

|             |                 |                                |
|-------------|-----------------|--------------------------------|
| Not defined | Since last scan | Time period X since last scan: |
|-------------|-----------------|--------------------------------|

### ***Age (mean, SD):***

|  |
|--|
|  |
|--|

### ***Number of patients in study total***

|  |
|--|
|  |
|--|

### ***Gender of patients (M/F or ratio)***

|   |   |
|---|---|
| M | F |
|---|---|

### ***Smoking history, pack-years, mean (SD)***

|         |      |         |
|---------|------|---------|
| Overall | Case | Control |
|---------|------|---------|

### ***FEV1 at baseline, and at interval, if available (mean, SD)***

|         |      |         |
|---------|------|---------|
| Overall | Case | Control |
|---------|------|---------|

### COPD severity (%)

|                     |       |       |       |       |        |
|---------------------|-------|-------|-------|-------|--------|
| COPD diagnosis %age | GOLD1 | GOLD2 | GOLD3 | GOLD4 | Other: |
|---------------------|-------|-------|-------|-------|--------|

### Methods

#### Study design

|        |              |     |       |
|--------|--------------|-----|-------|
| Cohort | Case-control | RCT | other |
|--------|--------------|-----|-------|

#### Study setting?

|              |                |
|--------------|----------------|
| Primary care | Secondary care |
|--------------|----------------|

#### Monitoring of smoking cessation

|               |               |                  |        |
|---------------|---------------|------------------|--------|
| Self-reported | CO monitoring | Urinary cotinine | Other: |
|---------------|---------------|------------------|--------|

#### Were the scans acquired for this purpose primarily?

|     |                 |
|-----|-----------------|
| Yes | No (why then?): |
|-----|-----------------|

#### Any other interventions carried out concurrently?

|  |
|--|
|  |
|--|

#### CT scanning protocol

|      |             |          |          |        |
|------|-------------|----------|----------|--------|
| LDCT | Inspiratory | Insp-exp | Contrast | Other: |
|------|-------------|----------|----------|--------|

### Results

| CT Measure  | Case (mean change, SD) | Control (mean change, SD) | p-value |
|-------------|------------------------|---------------------------|---------|
| %LAA/RA-910 |                        |                           |         |
| %LAA/RA-950 |                        |                           |         |
| %LAV        |                        |                           |         |
| Pi10        |                        |                           |         |
| PD15        |                        |                           |         |
| WA%         |                        |                           |         |
| PRM         |                        |                           |         |
| Other:      |                        |                           |         |

Duration between first and second scan (days) mean, SD if available

Duration between smoking cessation and second scan (days, mean, SD), if available

At first intervention

|                    |                             |
|--------------------|-----------------------------|
| Number of quitters | Number of continued smokers |
|--------------------|-----------------------------|

Other comments
